# Supplementary material for: Effects of the dual orexin receptor antagonist DORA-22 on sleep in 5XFAD mice
Source: PubMed Central journal article supplement — Alzheimers Dement (N Y). 2019 Feb 28;5:70–80. doi: 10.1016/j.trci.2019.01.003 (PMC6396100; doi:10.1016/j.trci.2019.01.003), 2019-02-28
Supplement: mmc1.pdf [file mmc1.pdf]

## Sleep-wake profiles--baseline

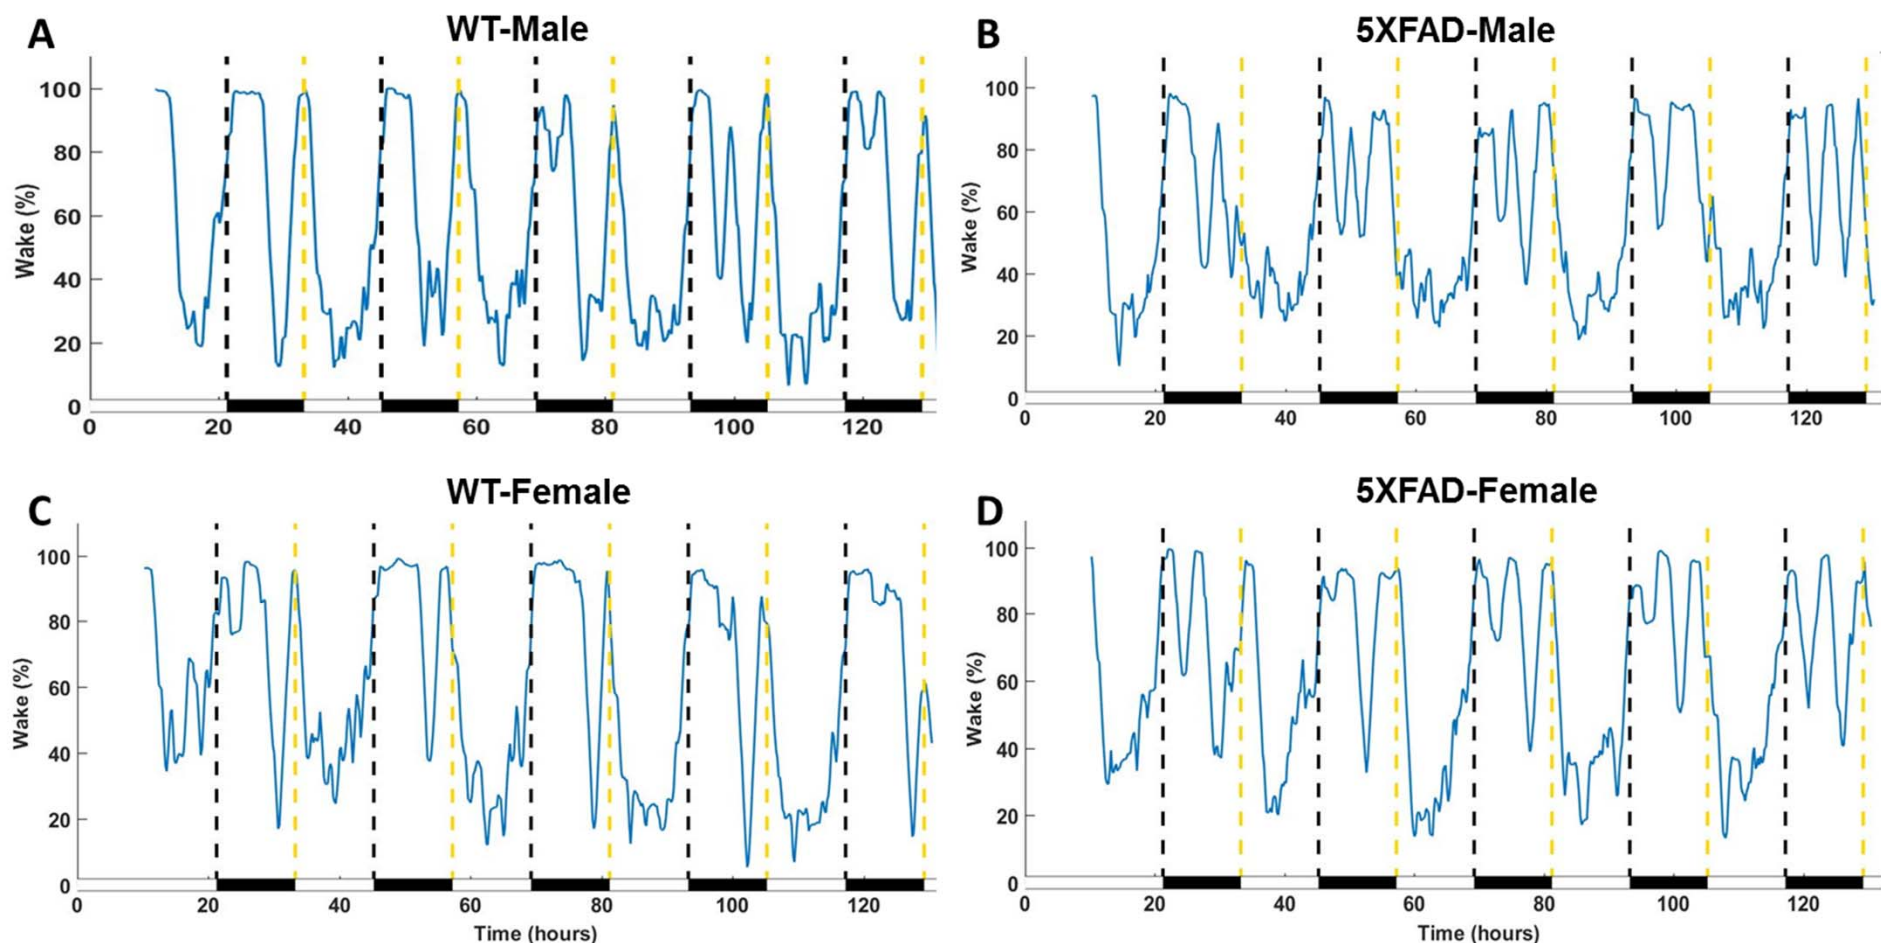

### Representative sleep-wake profiles of wild type and 5XFAD mice for baseline sleep

**recording.** The percent wake on the Y-axis is represented as a sliding average over a 2-h window.

Hours of recording are plotted on the X-axis where 0 represents the midnight of day 1. Dashed vertical lines demarcate the dark phase, which is also indicated at the bottom as a heavy horizontal black line.

(A) Wild type-male, (B) 5XFAD-male, (C) Wild type-female, (D) 5XFAD-female.
