# Supplementary material for: Effects of the dual orexin receptor antagonist DORA-22 on sleep in 5XFAD mice
Source: PubMed Central journal article supplement — Alzheimers Dement (N Y). 2019 Feb 28;5:70–80. doi: 10.1016/j.trci.2019.01.003 (PMC6396100; doi:10.1016/j.trci.2019.01.003), 2019-02-28
Supplement: mmc2.pdf [file mmc2.pdf]

## Sleep-wake profiles--during dosing

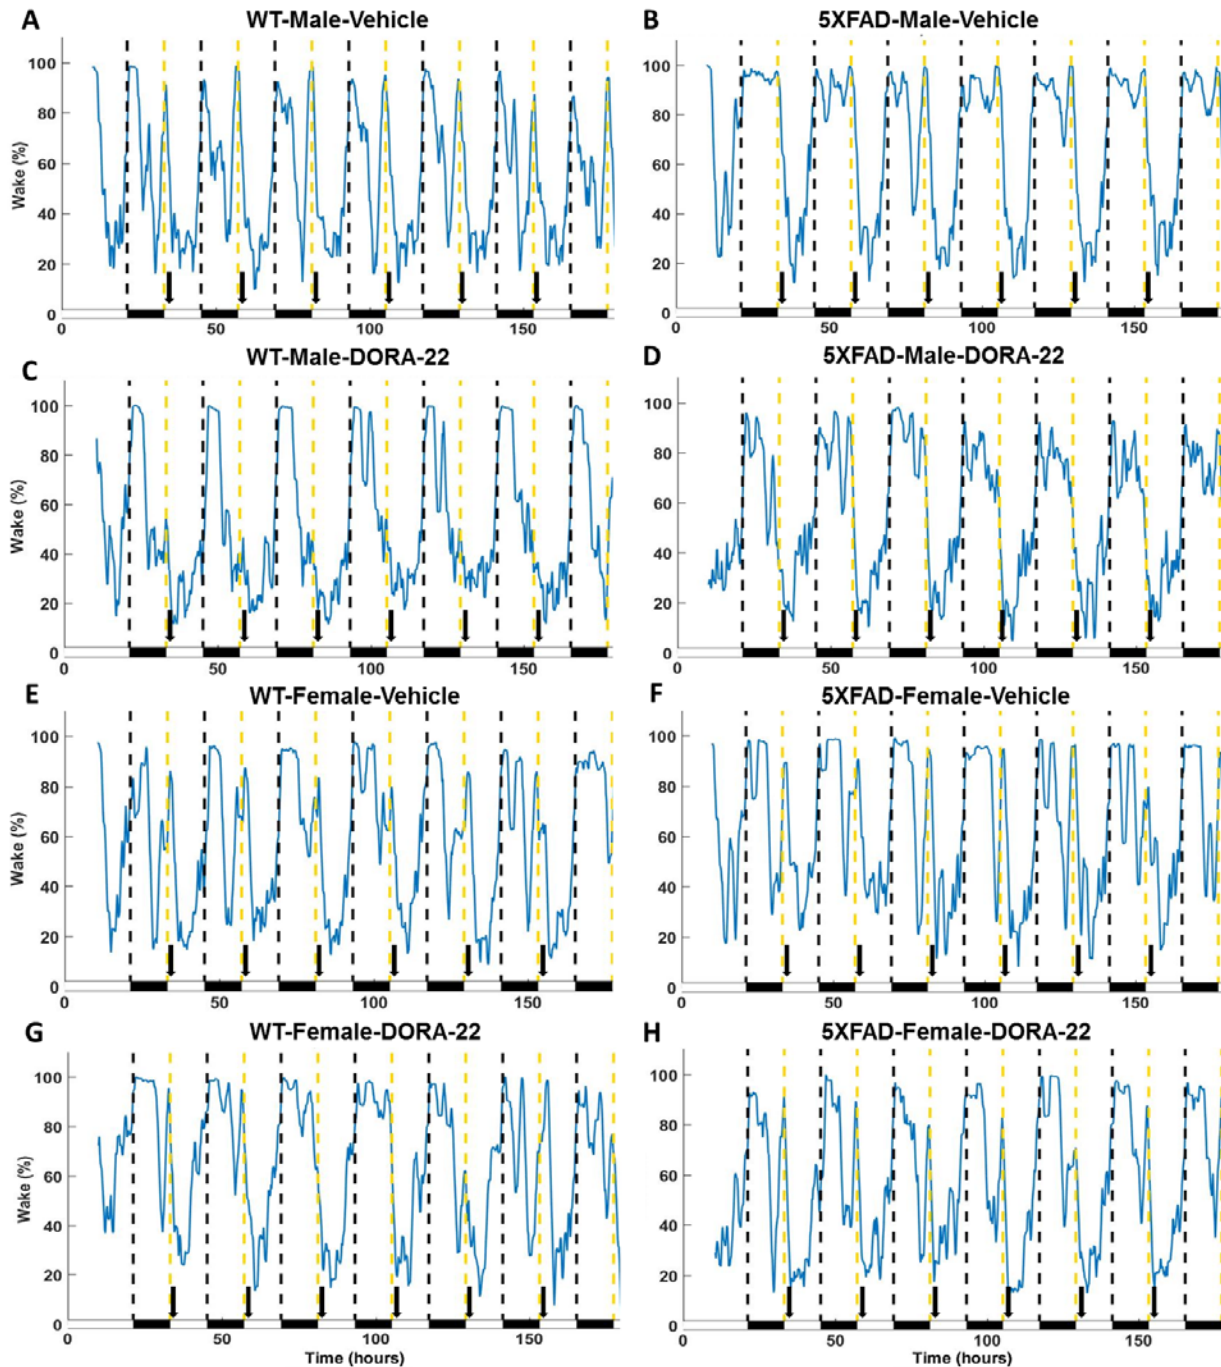

**Representative sleep-wake profiles of wild type and 5XFAD mice during the 5<sup>th</sup> week of dosing with vehicle or DORA-22 (100 mg/kg).**

The percent wake on the Y-axis is represented as a sliding average over a 2-h window. Hours of recording are plotted on the X-axis where 0 represents the midnight of day 1. Dashed vertical lines demarcate the dark phase, which is also indicated at the bottom as a heavy horizontal black line. (A) Wild type-male-vehicle, (B) 5XFAD-male-vehicle, (C) Wild type-male-DORA-22, (D) 5XFAD-male-DORA-22, (E) Wild type-female-vehicle, (F) 5XFAD-female-vehicle, (G) Wild type-female-DORA-22, (H) 5XFAD-female-DORA-22. Black arrows represent when mice were treated.
